# Supplementary material for: First Characterisation of the Phoma Species Complex on Maize Leaves in Central Europe
Source: MDPI journal article supplement (doi:10.3390/pathogens10091216), 2021-09-18
Supplement: s1 [file s1]

**Table S1.** Countries and locations where maize leaf samples were taken and/or analyzed for Phoma-like organisms and other pathogens.

| Country         | Locations | Locations visited* | Representative leaf samples analysed (2012-2013) |
|-----------------|-----------|--------------------|--------------------------------------------------|
| Poland          | 2         | 0                  | 2                                                |
| France          | 2         | 0                  | 4                                                |
| Austria         | 3         | 2                  | 10                                               |
| The Netherlands | 6         | 6                  | 23                                               |
| Czech Republic  | 6         | 6                  | 31                                               |
| Germany         | 27        | 9                  | 84                                               |
| <b>Total</b>    | 46        | 23                 | 154                                              |

\* Samples were either sent by local colleagues or collected by L. Ramos-Romero by visiting the individual experimental sites
